# Supplementary material for: Short Repeat Ribonucleic Acid Reduces Cytotoxicity by Preventing the Aggregation of TDP-43 and Its 25 KDa Carboxy-Terminal Fragment
Source: PubMed Central journal article supplement — JACS Au. 2024 Sep 24;4(10):3896–909. doi: 10.1021/jacsau.4c00566 (PMC11522920; doi:10.1021/jacsau.4c00566), 2024-09-24
Supplement: au4c00566_si_002.pdf [file au4c00566_si_002.pdf]

| REAGENT or RESOURCE                                                                                                                                                          | SOURCE                            | IDENTIFIER                   |
|------------------------------------------------------------------------------------------------------------------------------------------------------------------------------|-----------------------------------|------------------------------|
| <b>Antibodies</b>                                                                                                                                                            |                                   |                              |
| GFP conjugated to horseradish peroxidase                                                                                                                                     | MBL                               | 598-7; RRID:AB_10597267      |
| $\alpha$ -tubulin conjugated to horseradish peroxidase                                                                                                                       | Proteintech                       | HRP-66031; RRID:AB_2687491   |
| HSP70                                                                                                                                                                        | Proteintech                       | 10995-1-AP; RRID:AB_2264230  |
| Secondary rabbit horseradish peroxidase                                                                                                                                      | Jackson ImmunoResearch            | 111-035-144; RRID:AB_2307391 |
| <b>Chemicals, Peptides, and Recombinant Proteins</b>                                                                                                                         |                                   |                              |
| Dulbecco's Modified Eagle Medium                                                                                                                                             | Sigma-Aldrich                     | D5796                        |
| Fetal bovine serum                                                                                                                                                           | Thermo Fisher                     | 12676029                     |
| Penicillin G                                                                                                                                                                 | Fujifilm Wako Chemicals           | 168-23191                    |
| Streptomycin                                                                                                                                                                 | Fujifilm Wako Chemicals           | 168-23191                    |
| salmon sperm DNA                                                                                                                                                             | BioDynamics Laboratory Inc.       | F012                         |
| Polyethyleneimine                                                                                                                                                            | Fujifilm Wako Chemicals           | 043896                       |
| Lipofectamine RNAi MAX                                                                                                                                                       | Thermo Fisher                     | 13778150                     |
| Protease inhibitor cocktail                                                                                                                                                  | Sigma-Aldrich                     | P8340                        |
| Ni-NTA agarose beads                                                                                                                                                         | Fujifilm Wako Chemicals           | 143-09763                    |
| Biotin                                                                                                                                                                       | Fujifilm Wako Chemicals           | 029-08713                    |
| Amicon Ultra-10                                                                                                                                                              | Merck                             | UFC801024                    |
| ePAGEL (5-20% gradient gel)                                                                                                                                                  | ATTO                              | E-R520L                      |
| ePAGEL (12.5% gel)                                                                                                                                                           | ATTO                              | E-R12.5L                     |
| PrimeSTAR HS DNA polymerase                                                                                                                                                  | TaKaRa                            | R010A                        |
| SYBR Gold                                                                                                                                                                    | Thermo Fisher                     | S11494                       |
| Propidium iodide                                                                                                                                                             | Sigma-Aldrich                     | P4864                        |
| Benzonase                                                                                                                                                                    | Sigma-Aldrich                     | E1014                        |
| CanGet Signal Immunoreaction Enhancer Solution 1                                                                                                                             | TOYOBO                            | NKB-201                      |
| DRAQ7                                                                                                                                                                        | BioStatus                         | DR71000                      |
| Coomassie brilliant blue R-250                                                                                                                                               | Fujifilm Wako Chemicals           | 031-17922                    |
| HEPES                                                                                                                                                                        | Fujifilm Wako Chemicals           | 342-01375                    |
| Tris base                                                                                                                                                                    | Fujifilm Wako Chemicals           | 207-06275                    |
| Potassium chloride                                                                                                                                                           | Fujifilm Wako Chemicals           | 169-03542                    |
| Sodium chloride                                                                                                                                                              | Fujifilm Wako Chemicals           | 191-01665                    |
| Lithium chloride                                                                                                                                                             | Fujifilm Wako Chemicals           | 123-01162                    |
| Magnesium chloride                                                                                                                                                           | Fujifilm Wako Chemicals           | 133-00161                    |
| 1,6-Hexanediol                                                                                                                                                               | Tokyo Chemical Industry Co., Ltd. | H0099                        |
| <b>Experimental Models: Cell Lines</b>                                                                                                                                       |                                   |                              |
| Neuro-2a                                                                                                                                                                     | ATCC                              | CCL-131                      |
| Flp-In T-REx 293                                                                                                                                                             | Thermo Fisher                     | R78007                       |
| <b>Critical Commercial Assays</b>                                                                                                                                            |                                   |                              |
| Strep-Tactin XT Superflow suspension                                                                                                                                         | Zymo Research                     | 2-4031-005                   |
| Silver stain kit                                                                                                                                                             | Cosmo Bio                         | 423413                       |
| RNeasy Mini Kit                                                                                                                                                              | QIAGEN                            | 74104                        |
| Mir-X miRNA First-Strand Synthesis Kit                                                                                                                                       | TaKaRa                            | 638315                       |
| QuantiFluor RNA system                                                                                                                                                       | Promega                           | E3310                        |
| Agilent HS RNA kit                                                                                                                                                           | Agilent Technologies              | DNF-472                      |
| MGEasy RNA Directional Library Prep Set                                                                                                                                      | MGI Tech Co., Ltd.                | 1000006386                   |
| Qubit dsDNA Quantification Assay Kits                                                                                                                                        | Thermo Fisher                     | Q32851                       |
| dsDNA 915 reagent kit                                                                                                                                                        | Agilent Technologies              | DNF-915                      |
| MGEasy Circularization kit                                                                                                                                                   | MGI Tech Co., Ltd.                | 1000005259                   |
| DNBSEQ-G400RS high-throughput sequencing kit                                                                                                                                 | MGI Tech Co., Ltd.                | 1000016946                   |
| <b>Oligonucleotides</b>                                                                                                                                                      |                                   |                              |
| Polyhistidine and Strep-tag sense oligonucleotide for GFP-TDP43 5'TGT ACA GTC ACC ATC ATC ACC ATC ACT GGA GCC ACC CGC AGT TCG AAA AAT AAG CGG CCG C3'                        | This paper                        | N/A                          |
| Polyhistidine and Strep-tag antisense oligonucleotide for GFP-TDP43 5'GCG GCC GCT TAT TTT TCG AAC TGC GGG TGG CTC CAG TGA TGG TGA TGA TGG TGA CTG TAC A3'                    | This paper                        | N/A                          |
| Polyhistidine and Strep-tag sense oligonucleotide for GFP-TDP25 and GFP monomers 5'GCT AGC CAC CAT GCA CCA TCA TCA CCA TCA CTG GAG CCA CCC GCA GTT CGA AAA ACT ACC GGT3'     | This paper                        | N/A                          |
| Polyhistidine and Strep-tag antisense oligonucleotide for GFP-TDP25 and GFP monomers 5'ACC GGT AGT TTT TCG AAC TGC GGG TGG CTC CAG TGA TGG TGA TGA TGG TGC ATG GTG GCT AGC3' | This paper                        | N/A                          |
| AlexaFluor647-labeled G4 RNA 5'GGG GCC GGG GCC GGG GCC GGG GCC3'                                                                                                             | This paper                        | N/A                          |
| AlexaFluor647-labeled A4 RNA 5'AAA AUU AAA AUU AAA AUU AAA AUU3'                                                                                                             | This paper                        | N/A                          |
| AlexaFluor647-labeled UG RNA 5'UGU GUG UGU GUG UGU GUG UGU GUG3'                                                                                                             | This paper                        | N/A                          |
| AlexaFluor647-labeled G2 RNA 5'GGG GCC GGG GCC3'                                                                                                                             | This paper                        | N/A                          |
| AlexaFluor647-labeled A2 RNA 5'AAA AUU AAA AUU3'                                                                                                                             | This paper                        | N/A                          |
| G4 RNA 5'GGG GCC GGG GCC GGG GCC GGG GCC3'                                                                                                                                   | This paper                        | N/A                          |
| A4 RNA 5'AAA AUU AAA AUU AAA AUU AAA AUU3'                                                                                                                                   | This paper                        | N/A                          |

|                                                                                                                                                            |                                           |     |
|------------------------------------------------------------------------------------------------------------------------------------------------------------|-------------------------------------------|-----|
| Sense siRNA against the Renilla luciferase mRNA 5'GCC AAG AAG UUU CCU AAU ATT3'                                                                            | This paper                                | N/A |
| Antisense siRNA against the Renilla luciferase mRNA 5'UUAU UAG GAA ACU UCU UGG CTT A3'                                                                     | This paper                                | N/A |
| Sense oligonucleotide for M13N 5'GAT CCC CGT AAA ACG ACG GCC AGT GAG CTC ACC TGT GTG AAA TTG TTA TCC GCT CTT TTT A3'                                       | This paper                                | N/A |
| Antisense oligonucleotide for M13N 5'AGC TTA AAA AGA GCG GAT AAC AAT TTC ACA CAG GTG AGC TCA CTG GCC GTC GTT TTA CGG G3'                                   | This paper                                | N/A |
| Sense oligonucleotide for M13-G4 5'GAT CCC CGT AAA ACG ACG GCC AGT GGG GCC GGG GCC GGG GCC GGG GCC GAG CTC ACC TGT GTG AAA TTG TTA TCC GCT CTT TTT A3'     | This paper                                | N/A |
| Antisense oligonucleotide for M13-G4 5'AGC TTA AAA AGA GCG GAT AAC AAT TTC ACA CAG GTG AGC TCG GCC CCG GCC CCG GCC CCG GCC CCA CTG GCC GTC GTT TTA CGG G3' | This paper                                | N/A |
| Sense oligonucleotide for M13-A4 5'GAT CCC CGT AAA ACG ACG GCC AGT AAA ATT AAA ATT AAA ATT AAA ATT GAG CTC ACC TGT GTG AAA TTG TTA TCC GCT CTT TTT A3'     | This paper                                | N/A |
| Antisense oligonucleotide for M13-A4 5'AGC TTA AAA AGA GCG GAT AAC AAT TTC ACA CAG GTG AGC TCA ATT TTA ATT TTA ATT TTA ATT TTA CTG GCC GTC GTT TTA CGG G3' | This paper                                | N/A |
| Sense oligonucleotide for M13-G2 5'GAT CCC CGT AAA ACG ACG GCC AGT GGG GCC GGG GCC GAG CTC ACC TGT GTG AAA TTG TTA TCC GCT CTT TTT A3'                     | This paper                                | N/A |
| Antisense oligonucleotide for M13-G4 5'AGC TTA AAA AGA GCG GAT AAC AAT TTC ACA CAG GTG AGC TCG GCC CCG GCC CCA CTG GCC GTC GTT TTA CGG G3'                 | This paper                                | N/A |
| Sense oligonucleotide for M13-A2 5'GAT CCC CGT AAA ACG ACG GCC AGT AAA ATT AAA ATT GAG CTC ACC TGT GTG AAA TTG TTA TCC GCT CTT TTT A3'                     | This paper                                | N/A |
| Antisense oligonucleotide for M13-A2 5'AGC TTA AAA AGA GCG GAT AAC AAT TTC ACA CAG GTG AGC TCA ATT TTA ATT TTA CTG GCC GTC GTT TTA CGG G3'                 | This paper                                | N/A |
| M13 Forward primer 5'GTA AAA CGA CGG CCA GT3'                                                                                                              | This paper                                | N/A |
| M13 Reverse primer 5'GAG CGG ATA ACA ATT TCA CAC AGG3'                                                                                                     | This paper                                | N/A |
| ATTO647N-λDNA-F 5'GAT GAG TTC GTG TCC GTA CAA CT3'                                                                                                         | Sasaki A. et al. Sci. Rep. 5 (2015) 14428 | N/A |
| ATTO488-λDNA-R 5'GGT TAT CGA AAT CAG CCA CAG CG3'                                                                                                          | Sasaki A. et al. Sci. Rep. 5 (2015) 14428 | N/A |

#### Recombinant DNA

|                   |                                                                                     |              |
|-------------------|-------------------------------------------------------------------------------------|--------------|
| pGFP-TDP25        | Kitamura A. et al., Sci. Rep. 9 (2016) 19230                                        |              |
| pTDP43CS-GFP      | This paper; referred on Shodai A. et al., J. Bio. Chem. 288 (2013) 14886-14905      |              |
| pGFP-F220         | Kitamura A. et al., Commun. Biol. 7 (2024) 743                                      |              |
| pGFP-C274         | Kitamura A. et al., Sci. Rep. 9 (2016) 19230                                        |              |
| pmeGFP-N1         | Kitamura A. et al., Sci. Rep. 9 (2016) 19230                                        |              |
| pHSP70-GFP        | This paper; modified from Kitamura A. et al., Cell Stress Chap. 23 (2018) 1177-1183 |              |
| pEYFP-Actin       | Takara Bio Inc.                                                                     | 6902-1       |
| pEGFP-Tub         | Takara Bio Inc.                                                                     | 6117-1       |
| pCMV3-PC-GFPspark | Sino Biological Japan Inc.                                                          | HG15615-ACG  |
| pSUPERIOR.neo     | OligoEngine, Inc.                                                                   | VEC-IND-0004 |

#### Software and Algorithms

|                          |            |                                                 |
|--------------------------|------------|-------------------------------------------------|
| Carl Zeiss ZEN software  | Carl Zeiss |                                                 |
| Fiji-ImageJ software     | Fiji team  | <a href="https://fiji.sc/">https://fiji.sc/</a> |
| Microsoft Excel software | Microsoft  |                                                 |
